# Supplementary material for: An expeditious method for the ultra-level chemosensing of uranyl ions
Source: Royal Society of Chemistry journal article supplement (doi:10.1039/c9ay02715g), 2020-01-01
Supplement: c9ay02715g1.pdf [file c9ay02715g1.pdf]

## Supplementary Information

### Expeditious method for ultra-level chemosensing of Uranyl Ions

Vishaka V Halali and R Geetha Balakrishna \*

*Centre for Nano and Material Sciences, Jain University, Jain Global Campus, Kanakapura,  
Ramanagaram, Bangalore 562112, India*

**Corresponding Author\*:** [br.geetha@jainuniversity.ac.in](mailto:br.geetha@jainuniversity.ac.in)

| <b>SL No.</b> | <b>Table of Contents</b>                                                                           | <b>Page No.</b> |
|---------------|----------------------------------------------------------------------------------------------------|-----------------|
| 1             | Materials                                                                                          | 3               |
| 2             | Instrumentation                                                                                    | 3               |
| 3             | Synthesis of Probe <b>(P1)</b>                                                                     | 3               |
| 4             | Mass spectra of <b>P1 (Fig. S1)</b>                                                                | 4               |
| 5             | NMR spectra of Probe <b>P1 (Fig. S2)</b>                                                           | 5               |
| 6             | Mass spectra of Probe <b>P1 + UO<sub>2</sub><sup>2+</sup> complex (Fig. S3)</b>                    | 6               |
| 7             | <b><sup>13</sup>C NMR spectrum of P1 + UO<sub>2</sub><sup>2+</sup> + AcO<sup>-</sup> (Fig. S4)</b> | 7               |
| 8             | Recyclability graph <b>(Fig. S5)</b>                                                               | 8               |
| 9             | IR Spectra of Probe <b>P1</b> and Probe <b>P1 + UO<sub>2</sub><sup>2+</sup> complex (Fig. S6)</b>  | 9               |
| 10            | Measurement of Optical properties of <b>P1</b>                                                     | 10              |
| 11            | Source of UO <sub>2</sub> <sup>2+</sup> in groundwater real samples                                | 10              |

## 1. Materials

Rhodamine 6G, Hydrazine hydrate, Ethanol, 2-hydroxy-1-naphthaldehyde of analytical lab grade (Sigma-Aldrich) was used for the synthesis of the probe (**P1**). Chloride and nitrate salts of all cations were procured from Sigma-Aldrich and used without any more purification.

## 2. Instrumentation

All reactions were magnetically stirred and thin-layer chromatography (TLC) by Merck TLC Silica gel 60 F<sub>254</sub> coated plates were used to monitor the reaction. A Bruker 11767542 ATR-IR spectrophotometer was utilized to carry out the IR analysis of the samples. NMR spectroscopic measurements in CDCl<sub>3</sub> were recorded with an Agilent spectrometer 400. The <sup>1</sup>H NMR and <sup>13</sup>C NMR chemical shift values are represented in ppm (δ) correlative to CDCl<sub>3</sub>. Waters SynaptG2 LC-MS spectrometer was used to record the Mass spectra. Absorbance (UV-Vis) spectroscopic study was carried out with a Shimadzu UV-1800 spectrophotometer using quartz cuvette. AAS measurements were carried out using Agilent 55B AA spectrometer. ICP-OES measurements were recorded Agilent 5100 VDV ICP-OES instrument and all pH deviations were measured with Systronics digital pH meter 802.

## 3. Synthesis of Schiff base (**P1**)

Chemosensor (**P1**) was synthesized by a simple Schiff base condensation reaction. In the typical experiment, the first step synthesis of Rhodamine 6G Hydrazide was prepared as per the early reported literature[61]. In the second step, 2-hydroxy-1-naphthaldehyde (2.0 mM) was added to the stirring Rhodamine 6G Hydrazide (2.1 mM) in ethanol (25 mL) and the reaction was refluxed for 24 h at 70 °C. The obtained product was filtered and the filtrate was washed many times with absolute ethanol to remove any unreacted material. The purity of the product was checked by spotting a product on chromatographed silica plate [60 F<sub>254</sub>] with an eluent hexane/ethyl acetate (8:2, v/v) to get a light yellow solid (**P1**). The final product was characterized using <sup>1</sup>H NMR, <sup>13</sup>C NMR, LC-MS, and ATR-IR.

4.

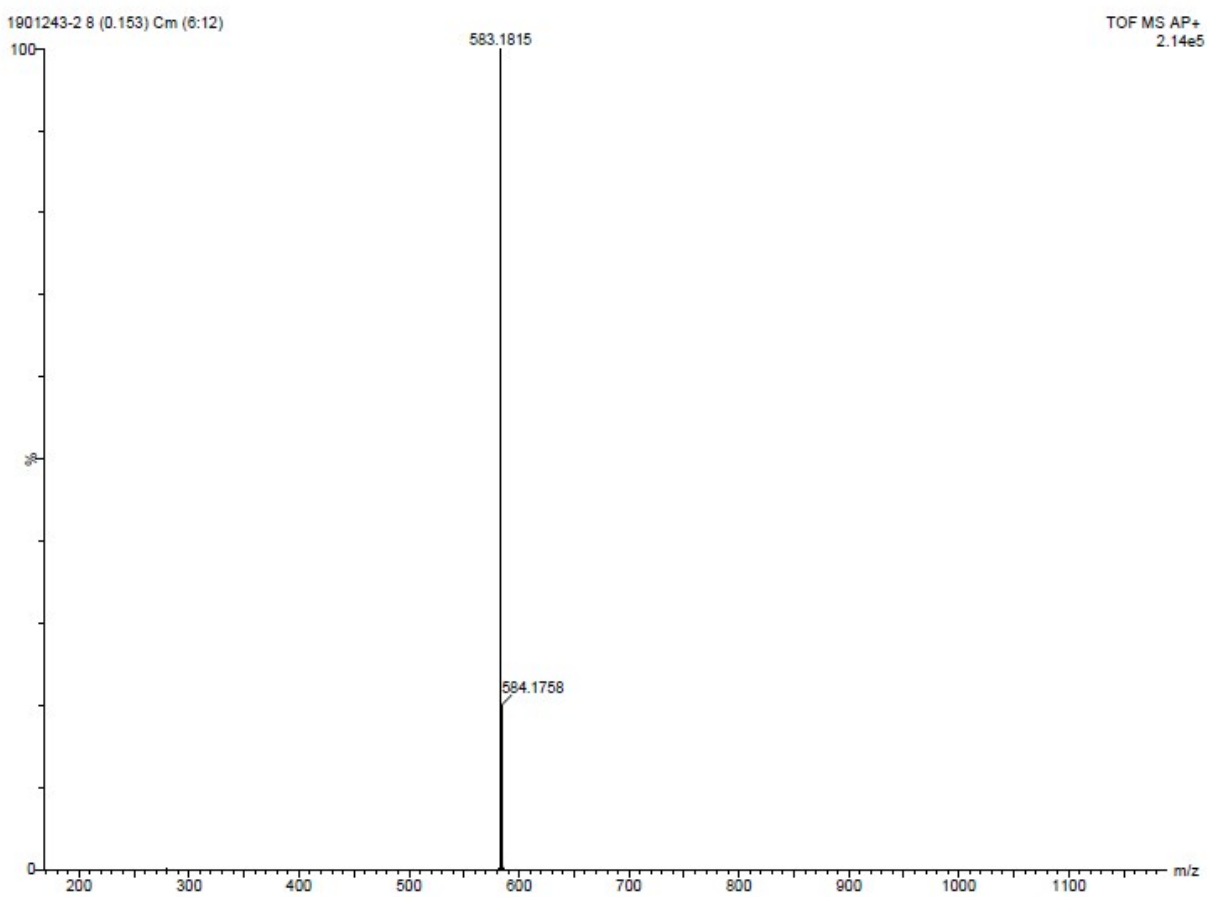

**Fig. S1 Mass spectrum of P1**

5.

(a)

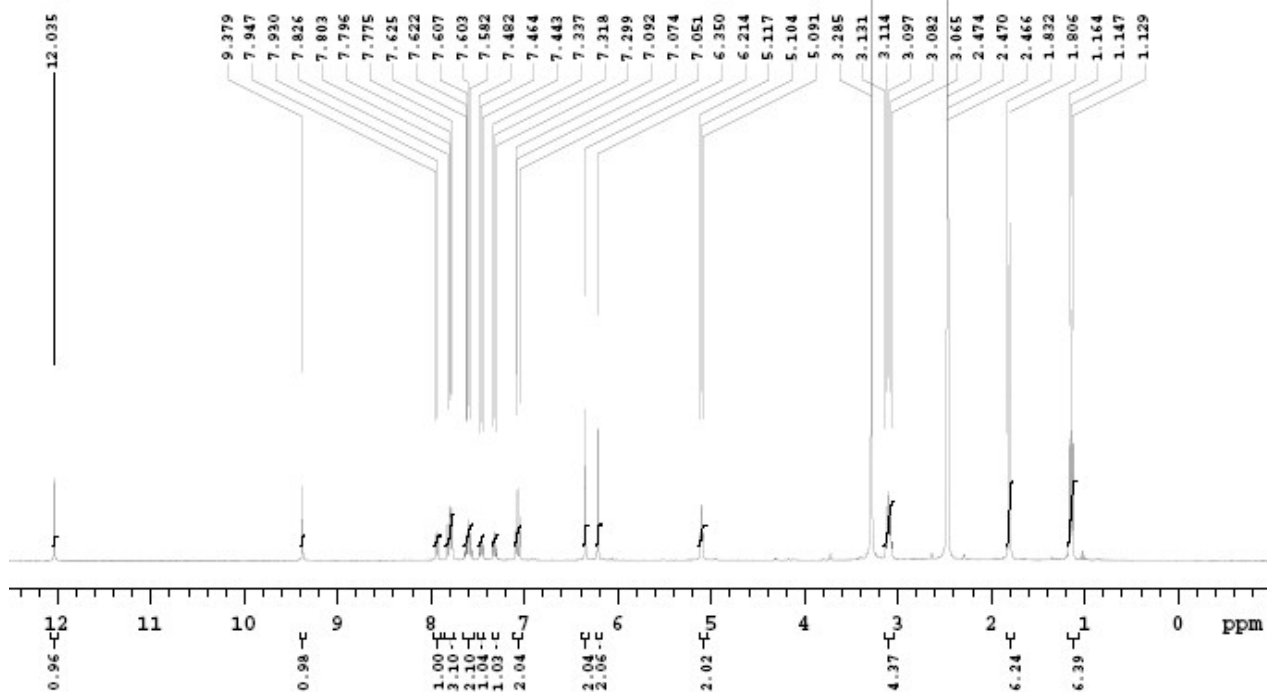

(b)

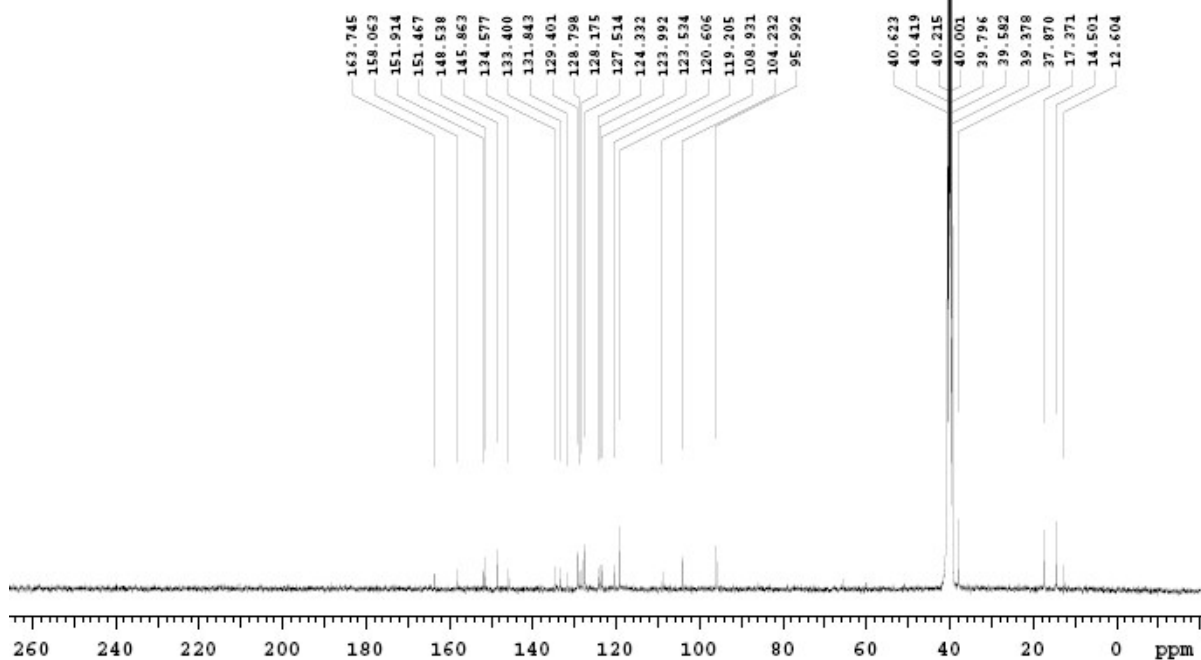

Fig. S2 (a) <sup>1</sup>H NMR spectrum of P1 and (b) <sup>13</sup>C NMR spectrum of P1

6.

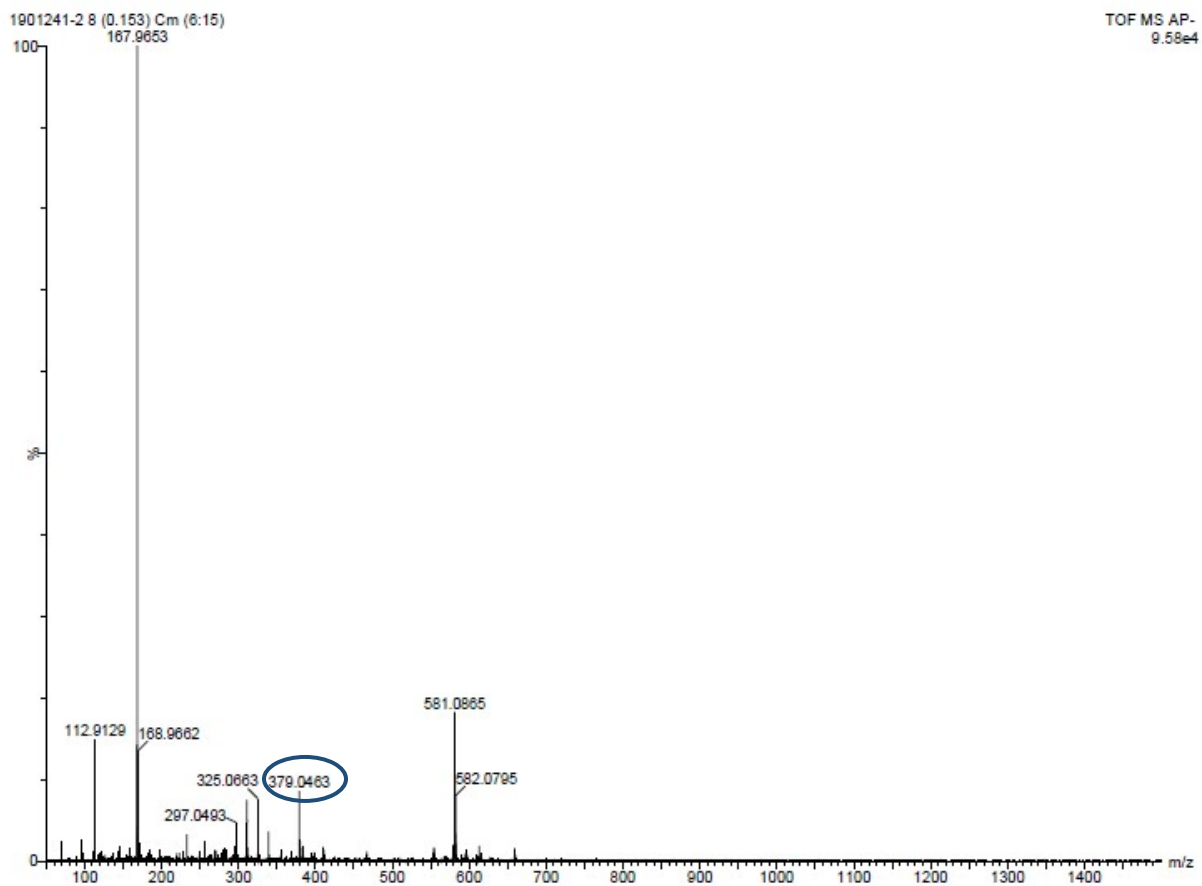

Fig. S3 Mass spectra of Probe P1 +  $\text{UO}_2^{2+}$  complex

7.

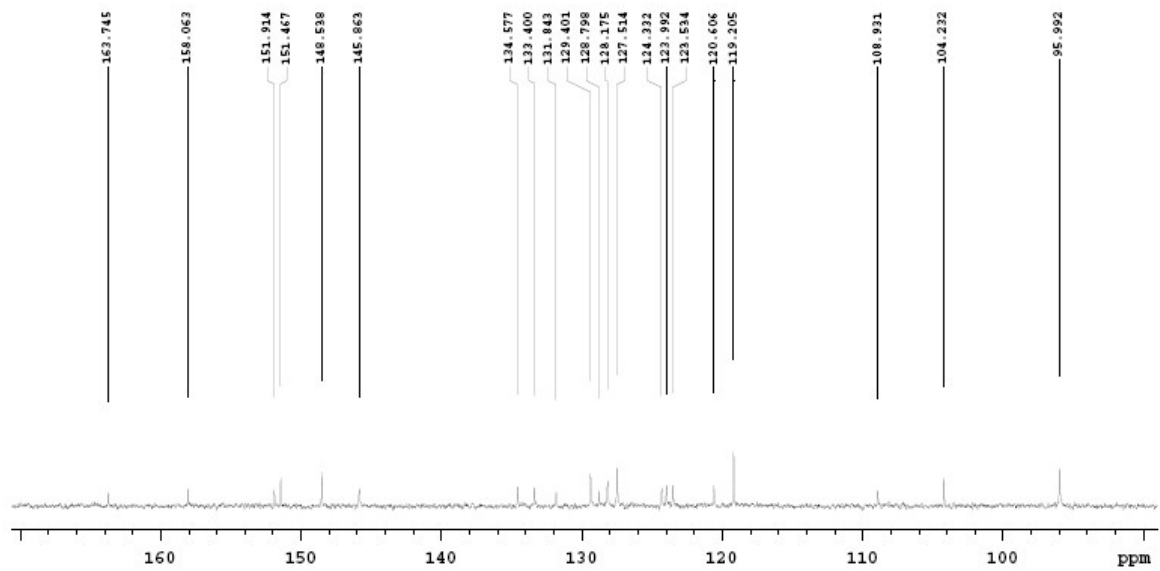

Fig. S4  $^{13}\text{C}$  NMR spectrum of P1 +  $\text{UO}_2^{2+}$  +  $\text{AcO}^-$

8.

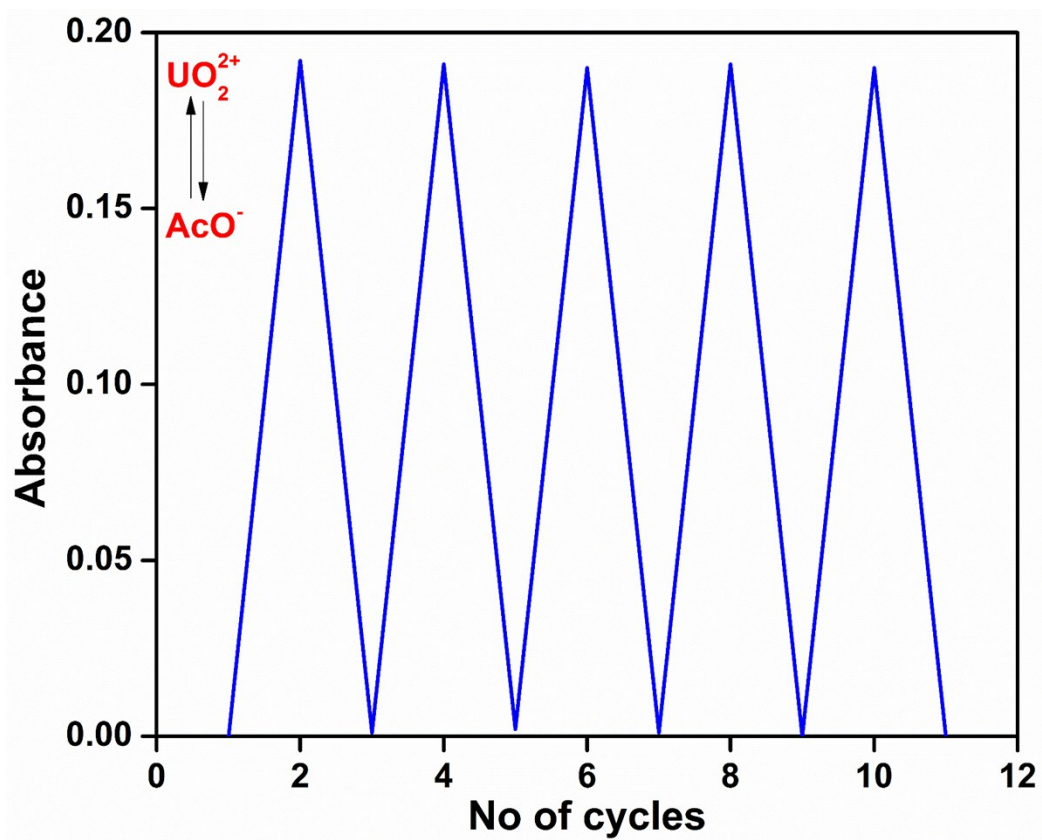

Fig. S5 Recyclability spectrum of P1 with  $\text{AcO}^-$  ions



9.

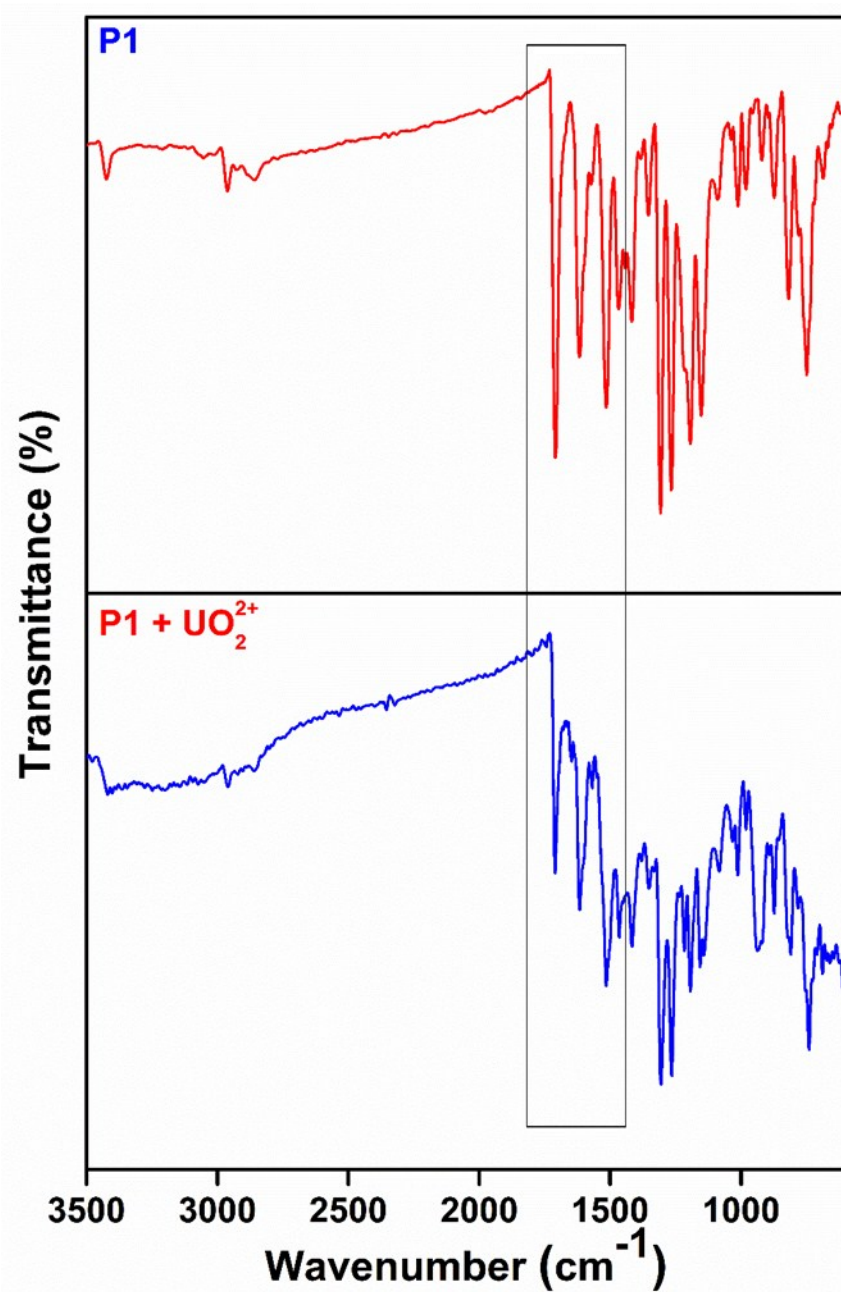

Fig. S6 IR spectrum of P1 and P1 + UO<sub>2</sub><sup>2+</sup>

## 10. Measurement of Optical Properties of P1

The solution of probe **P1** ( $1.0 \times 10^{-4}$  M) and different metal ion stock solution ( $1.0 \times 10^{-2}$  M) were **prepared in MeCN at pH 6**. The UV-vis spectrum of the solution (50  $\mu$ M) was recorded using a quartz optical cuvette at ambient temperature. For the titration experiments, the concentration of **P1** was kept constant while the concentration of metal ions was varied between 0 to 100  $\mu$ M. The binding constant for the complex **P1** +  $\text{UO}_2^{2+}$  was calculated using the Benesi-Hildebrand plot [62] in which the graph was plotted between  $A_0/A-A_0$  and  $1/\text{UO}_2^{2+}$  and the slope of the plot was calculated. Also, the detection limit was estimated by measuring the standard deviation of blank [61].

## 11. Source of $\text{UO}_2^{2+}$ in groundwater real samples

Groundwater samples were collected from Magadi Lake, Chickmagalur district and collected from Chickballapur Lake, Kolar district, Karnataka, India.
